# Supplementary material for: Arthroscopic surgery for degenerative knee arthritis and meniscal tears: a clinical practice guideline
Source: PubMed Central journal article supplement — BMJ. 2017 May 11;357:j1982. doi: 10.1136/bmj.j1982 (PMC5426368; doi:10.1136/bmj.j1982), 2017-05-11
Supplement: sier036168.w6.pdf [file sier036168.w6.pdf]

We would like to appeal against the decision on our article.

Thank you Elizabeth for the conversation. We agree with many of the points the reviewers have made and believe that we can readily respond to all of them. The editors raised concerns that many of the analyses and conclusions relied on uncertain estimates of the minimally important difference. We agree that there is concerns with uncertainty in the MID estimate and will perform appropriate sensitivity analyses where relevant. We further note that the analyses that relied on the MID estimates were complimentary to the many other approaches.

We hope to revise this paper, in addition to the MID paper (for BMJ Open) and highlight the uncertainties in many of the MID estimates. After the updates are complete, we will have the Rapid Recommendation panel consider any changes.

Thank you sincerely for your consideration.

Reed Siemieniuk  
on behalf of the Rapid Recommendations systematic review team
